# Supplementary material for: Is Cystolitholapaxy Sufficient in Patients with Bladder Stones Secondary to Benign Prostatic Obstruction?
Source: Research Square preprint supplement (doi:10.21203/rs.3.rs-6783314/v1), 2025-06-10
Supplement: Supplementary file 1 [file 003aa6cb0ac00d561b595c2c.docx]

**Table 1:** Clinical characteristics of the groups (n: number, SD: standard deviation, LUTS: lower urinary tract symptoms, BPO: benign prostatic obstruction, CCI: Charlson Comorbidity Index, min: minimum, max: maximum, IQR: interquartile range, ASA: American Society of Anesthesiologists, IPSS: international prostate symptoms score, PSA: prostate specific antigen, BS: bladder stones, TPV: total prostate volume, Qmax: peak urine flow rate, PVR: postvoid residual urine volume, UTI: urinary tract infection, mo: months)

|  | **Group 1 (n=190)** | **Group 2 (n=45)** | **P value** |
| --- | --- | --- | --- |
| **Age (years), mean ± SD** | 59.3 ± 11.5 | 63.1 ± 9.1 | <0.001 |
| **Mode of presentation, n (%)**  **Predominantly voiding LUTS**  **Dysuria**  **Predominantly storage LUTS**  **Hematuria**  **Pain**  **Others** | 85 (44.7)  45 (23.7)  26 (13.7)  7 (3.7)  22 (11.6)  5 (2.6) | 27 (60)  5 (11.1)  8 (17.8)  2 (4.4)  2 (4.4)  1 (2.2) | 0.236 |
| **History of medical treatment for BPO, n (%)**  **Yes**  **No** | 33 (17.4)  157 (82.6) | 9 (20)  36 (80) | 0.679 |
| **CCI, median (min-max) (IQR)** | 2 (0-9) (2) | 3 (0-8) (3) | 0.108 |
| **ASA score, median (min-max) (IQR)** | 2 (1-3) (0) | 2 (1-3) (0) | 0.729 |
| **IPSS, mean ± SD** | 16.7 ± 5 | 21.7 ± 4.7 | <0.001 |
| **PSA (ng/mL), mean ± SD** | 2.5 ± 2.8 | 4.6 ± 4.6 | 0.005 |
| **Max diameter of BS (mm), mean ± SD** | 24.9 ± 15.1 | 28.6 ± 14.5 | 0.135 |
| **TPV (g), mean ± SD** | 49 ± 30 | 61 ± 27.5 | 0.015 |
| **Qmax (m/s), mean ± SD** | 11 ± 2.9 | 8.6 ± 3.2 | <0.001 |
| **PVR (mL) , mean ± SD** | 85.5 ± 30.5 | 115.3 ± 42.8 | <0.001 |
| **Complication, n (%)**  **No**  **Symptomatic UTI**  **Prolonged hematuria**  **Fever** | 180 (94.7)  8 (4.3)  1 (0.5)  1 (0.5) | 43 (95.6)  1 (2.2)  1 (2.2)  0 | 0.659 |
| **Follow-up period (mo), mean ± SD** | 47.3 ± 32.9 | 56.1 ± 38.1 | 0.679 |
| **Time until secondary intervention (mo), mean ± SD** |  | 35.1 ± 19.8 |  |
